# Supplementary material for: Overexpression of a Voltage-Dependent Anion-Selective Channel (VDAC) Protein-Encoding Gene, MsVDAC, from Medicago sativa Confers Cold and Drought Tolerance to Transgenic Tobacco
Source: MDPI journal article supplement (doi:10.3390/genes12111706), 2021-10-27
Supplement: s1 [file s1]

**Table S1.** qPCR Primers of stress response related genes.

| Gene Name          | Primer Sequence           | Gene Function                                       |
|--------------------|---------------------------|-----------------------------------------------------|
| <i>MsActin-F</i>   | TTTGAGACTTTCAATGTGCCCCGCC | Action gene of alfalfa                              |
| <i>MsActin-R</i>   | TAGCATGTGGGAGTGCATAACCCT  |                                                     |
| <i>NtActin-F</i>   | GCTTTCTTCGTCCCATCA        | Action gene of tobacco                              |
| <i>NtActin-R</i>   | CCCCAAGTACCCTCGTAT        |                                                     |
| <i>CBL1-F</i>      | GCCTCACAAGAAGAGAAGATCA    | calcineurin B-like protein 1                        |
| <i>CBL1-R</i>      | AACTTCATCTCAGACTCGCATAG   |                                                     |
| <i>GAPC-F</i>      | GTGCTGATTTCTGTTGTGGAATC   | glyceraldehyde-3-phosphate dehydrogenase, cytosolic |
| <i>GAPC-R</i>      | GAGCAGAGATCACAAACCTTCTT   |                                                     |
| <i>BI-1-F</i>      | CTTTGGAACATTGGTGGCTTAC    | bax inhibitor 1-like                                |
| <i>BI-1-R</i>      | CCATCAGAAGTGCTATCCTCTTT   |                                                     |
| <i>Hxk3-F</i>      | TTCATCAACCTCCTGGTAAGC     | hexokinase-2-like                                   |
| <i>Hxk3-R</i>      | CCTTTCGTCCACCTGATAAGAG    |                                                     |
| <i>GR1-F</i>       | CAGAATGACCAGAGTCCTCTAAC   | protein gamma response 1                            |
| <i>GR1-R</i>       | CCAGCACTTCATGTTTGTCTTC    |                                                     |
| <i>Cu,Zn-SOD-F</i> | AGCAGCAGTGAAGGTGTTAG      | Superoxide dismutase [Cu-Zn] 2                      |
| <i>Cu,Zn-SOD-R</i> | GGCCAGAGACATTTCCAGTAA     |                                                     |
| <i>MnSOD-F</i>     | CGGCAATTAGCGGTGACATA      | superoxide dismutase [Mn], mitochondrial-like       |
| <i>MnSOD-R</i>     | ATGGCGTCATGTAGCTGTTC      |                                                     |
| <i>Ltp1-F</i>      | CGAATTGGCACCTTGTCTTG      | non-specific lipid-transfer protein 1               |
| <i>Ltp1-R</i>      | GCAGAATTCACCAGAGCCTTA     |                                                     |
| <i>ERD10B-F</i>    | CAAGGCGGAAGAAGGAAGAA      | dehydrin DHN1-like                                  |
| <i>ERD10B-R</i>    | CGTAGTTGTTGCAGTTGAATGAG   |                                                     |
| <i>SnRK2-F</i>     | CTGTAGGGACGCCTGCTTATG     | serine/threonine-protein kinase SRK2A               |
| <i>SnRK2-R</i>     | TGGACTTGTTTCGGGGATTGA     |                                                     |

**Table S2.** The full-length cDNA of *MsVDAC*.

| Gene          | Sequence                                                                                                                                                                                                                                                                                                                                                                                                                                                                                                                                                                                                                                                                                                                                                                                                                                                                                                                       |
|---------------|--------------------------------------------------------------------------------------------------------------------------------------------------------------------------------------------------------------------------------------------------------------------------------------------------------------------------------------------------------------------------------------------------------------------------------------------------------------------------------------------------------------------------------------------------------------------------------------------------------------------------------------------------------------------------------------------------------------------------------------------------------------------------------------------------------------------------------------------------------------------------------------------------------------------------------|
| <i>MsVDAC</i> | ATGGCTAACGGTCCAGCACCGTTTTCTGAGATTGGCAAAGAGCAAG<br>AGACCTCTTGTACAAGGATTATAATTCGACCACAAGTTTAGCCTGTCGAT<br>TCCAAGTTCCACTGGATTGGGCCTTACAGCTACAGGGTTGAAGAGGGATA<br>AATTTTTTGTGGTGACTTAAACACGCTTTACAAGAGTGGAATGTTACAG<br>TGGATGTGAAAGTCAATACAGACTCTAATGTATCTACAAAAGTGACTTTGA<br>ATGATGTTTCCCTTTCCCATAGTAAAAAGTAGCGTTGAGCTTCAATATAC<br>CTGATCACAAGTCAGGAAAGTTGGATGTGCAGTATCTTCATCCTCATGCAG<br>CTATTGATTCCAGTATTGGCTTGAACCCAGCCCCTAAATTGGAGCTTTCCG<br>CTGCAATTGGAAGCAAAGATATATCTATGGGTGCTGAAGTTGGATTGATA<br>CAACCTCTGCTTCATTCTCAACATATAATGCCGGGATTGCCTTCAATAAAC<br>CAGATTTCTCTGCAACACTTATGCTGGCTGATAAAGGACAGTCTCTGAAG<br>GCATCTTACATTCATTATGTGGACCGCCAGATGGATTAACAGTTGCTGCT<br>GAACTCGCTCACAAGTTGTCCTTTCTGAGAACAGATTTACCTTTGGGAC<br>CTCACAGTCAATAGATCCAAAAACAGTTTTGAAGACTCGATTCAGTGATG<br>ATGGCAAAGCTGCCTTCCAATGCCAACGAGCGTGGAGGCCAAATTCCTC<br>ATAACCCTATCTGCCGAGTATGACTCCAAAAAATCATTGGTTCACCTGCC<br>AAATTCGGTCTCGCTCTTTCTCTCAAGCCTTAA |
